# Supplementary material for: The Aquilegia genome provides insight into adaptive radiation and reveals an extraordinarily polymorphic chromosome with a unique history
Source: PubMed Central journal article supplement (PMC6255393; doi:10.7554/elife.36426), 2018-10-16
Supplement: elife-36426-supp1.pdf [file elife-36426-supp1.pdf]

**Supplementary File 1.** Genomic libraries included in the *A. coerulea* genome assembly and their respective assembled sequence coverage levels in *A. coerulea* v3.1 release.

| Library | Sequencing platform | Average read/<br>insert size | Read number | Assembled equence<br>overage (x) |
|---------|---------------------|------------------------------|-------------|----------------------------------|
| FTOY    | Sanger              | 2,632 ± 200                  | 1,609,053   | 2.56                             |
| GHCH    | Sanger              | 2,638 ± 201                  | 489,984     | 0.80                             |
| FTOX    | Sanger              | 6,458 ± 677                  | 1,804,031   | 2.87                             |
| GHHF    | Sanger              | 6,460 ± 679                  | 519,264     | 0.83                             |
| FTOW    | Sanger              | 33,419 ± 3,521               | 219,070     | 0.31                             |
| GGNB    | Sanger              | 33,431 ± 3,496               | 36,768      | 0.05                             |
| COL     | Sanger              | 123,731 ± 38,119             | 95,040      | 0.17                             |
| Total   |                     |                              | 4,773,210   | 7.59                             |
