# Supplementary material for: The Aquilegia genome provides insight into adaptive radiation and reveals an extraordinarily polymorphic chromosome with a unique history
Source: PubMed Central journal article supplement (PMC6255393; doi:10.7554/elife.36426), 2018-10-16
Supplement: elife-36426-supp2.pdf [file elife-36426-supp2.pdf]

**Supplementary File 2.** Summary statistics of the output of the whole genome shotgun assembly prior to screening, removal of organelles and contaminating scaffolds and chromosome-scale pseudomolecule construction. The table shows total contigs and total assembled basepairs for each set of scaffolds greater than the size listed in the left hand column.

| Minimum scaffold length | Number of scaffolds | Number of contigs | Scaffold size | Basepairs   | % Non-gap basepairs |
|-------------------------|---------------------|-------------------|---------------|-------------|---------------------|
| 5 Mb                    | 14                  | 1,438             | 94,320,677    | 92,114,319  | 97.66               |
| 2.5 Mb                  | 38                  | 2,890             | 177,446,204   | 172,758,974 | 97.36               |
| 1 Mb                    | 87                  | 4,445             | 257,833,655   | 250,413,462 | 97.12               |
| 500 Kb                  | 119                 | 5,059             | 282,450,696   | 273,716,964 | 96.91               |
| 250 Kb                  | 140                 | 5,324             | 290,151,377   | 280,639,834 | 96.72               |
| 100 Kb                  | 168                 | 5,631             | 294,581,469   | 283,539,175 | 96.25               |
| 50 Kb                   | 194                 | 5,808             | 296,290,157   | 284,968,083 | 96.18               |
| 25 Kb                   | 255                 | 6,094             | 298,499,112   | 286,606,915 | 96.02               |
| 10 Kb                   | 606                 | 7,055             | 303,523,673   | 291,234,712 | 95.95               |
| 5 Kb                    | 1,202               | 8,310             | 307,762,011   | 295,088,014 | 95.88               |
| 2.5 Kb                  | 2,152               | 9,914             | 311,235,474   | 298,320,877 | 95.85               |
| 1 Kb                    | 2,226               | 10,013            | 311,372,308   | 298,443,577 | 95.85               |
| 0 bp                    | 2,529               | 10,316            | 311,527,937   | 298,599,206 | 95.85               |
