# Supplementary material for: The Aquilegia genome provides insight into adaptive radiation and reveals an extraordinarily polymorphic chromosome with a unique history
Source: PubMed Central journal article supplement (PMC6255393; doi:10.7554/elife.36426), 2018-10-16
Supplement: elife-36426-supp3.pdf [file elife-36426-supp3.pdf]

**Supplementary File 3.** Final summary assembly statistics for chromosome-scale assembly.

---

|                         |                     |
|-------------------------|---------------------|
| Scaffold total          | 1,034               |
| Contig total            | 7,930               |
| Scaffold sequence total | 306.5 Mb            |
| Chromosome sequence     | 282.6 Mb            |
| Contig sequence total   | 291.7 Mb (4.8% gap) |
| Scaffold N/L50          | 4/43.6 Mb           |
| Contig N/L50            | 797/110.9 Kb        |

---
