# Supplementary material for: The Aquilegia genome provides insight into adaptive radiation and reveals an extraordinarily polymorphic chromosome with a unique history
Source: PubMed Central journal article supplement (PMC6255393; doi:10.7554/elife.36426), 2018-10-16
Supplement: elife-36426-supp4.pdf [file elife-36426-supp4.pdf]

**Supplementary File 4.** Placement of the individual BAC clones and their contribution to the overall error rate.

| Fosmid<br>clone ID | Length    | Chromosome | Start    | Stop     | Discrepant<br>bases |
|--------------------|-----------|------------|----------|----------|---------------------|
| 9413               | 119658    | Chr_02     | 42736342 | 42855946 | 0                   |
| 9446               | 173129    | Chr_02     | 20577579 | 20750820 | 1                   |
| 9436               | 124874    | Chr_05     | 34205168 | 34328207 | 2                   |
| 9431               | 45731     | Chr_06     | 10559008 | 10602180 | 1                   |
| 9449               | 183288    | Chr_01     | 2756617  | 2939634  | 18                  |
| 9412               | 166127    | Chr_07     | 17866735 | 18030762 | 33                  |
| 9419               | 130227    | Chr_03     | 19399302 | 19529716 | 28                  |
| 9437               | 119406    | Chr_01     | 36503268 | 36621202 | 27                  |
| 9429               | 131322    | Chr_05     | 15731088 | 15862409 | 35                  |
| 9450               | 121062    | Chr_05     | 42742789 | 42865380 | 36                  |
| 9428               | 137275    | Chr_01     | 18470512 | 18607862 | 41                  |
| 9404               | 107650    | Chr_03     | 32268312 | 32374757 | 35                  |
| 9427               | 160464    | Chr_07     | 543990   | 704396   | 53                  |
| 9442               | 130064    | Chr_03     | 30119597 | 30129597 | 48                  |
| 9416               | 167046    | Chr_05     | 23092053 | 23258725 | 69                  |
| 9409               | 140373    | Chr_07     | 31933377 | 32073020 | 72                  |
| 9435               | 117612    | Chr_04     | 44491410 | 44609808 | 63                  |
| 9403               | 153476    | Chr_02     | 38659429 | 38811278 | 98                  |
| 9441               | 87456     | Chr_04     | 6547153  | 6628689  | 78                  |
| 9408               | 165608    | Chr_07     | 30512052 | 30676049 | 236                 |
| 9444               | 171059    | Chr_04     | 25447280 | 25613428 | 363                 |
| 9447               | 65772     | Chr_06     | 1652383  | 1717537  | 151                 |
| 9433               | 145126    | Chr_04     | 38529772 | 38643947 | 343                 |
| Total              | 3,063,805 |            |          |          |                     |
