# Supplementary material for: The Aquilegia genome provides insight into adaptive radiation and reveals an extraordinarily polymorphic chromosome with a unique history
Source: PubMed Central journal article supplement (PMC6255393; doi:10.7554/elife.36426), 2018-10-16
Supplement: elife-36426-supp6.pdf [file elife-36426-supp6.pdf]

**Supplementary File 6.** Ratio of polymorphism (poly) or divergence (div) on each chromosome versus genome-wide for each species. Polymorphism is the number of pairwise differences within a species, divergence is the pairwise differences between the species and *Semiaquilegia*. Both are calculated at fourfold degenerate sites.

| Species              | Ratio type | Chr_01 | Chr_02 | Chr_03 | Chr_04 | Chr_05 | Chr_06 | Chr_07 |
|----------------------|------------|--------|--------|--------|--------|--------|--------|--------|
| <i>A. pubescens</i>  | poly       | 0.310  | 1.154  | 1.167  | 1.774  | 1.058  | 1.109  | 1.112  |
|                      | div        | 0.971  | 0.973  | 1.004  | 1.204  | 0.972  | 1.014  | 1.008  |
| <i>A. barnebyi</i>   | poly       | 0.915  | 0.868  | 0.979  | 2.053  | 0.968  | 0.958  | 0.979  |
|                      | div        | 0.974  | 0.973  | 1.004  | 1.206  | 0.972  | 1.016  | 1.003  |
| <i>A. aurea</i>      | poly       | 0.956  | 0.790  | 0.807  | 1.601  | 1.121  | 1.834  | 0.450  |
|                      | div        | 0.977  | 0.969  | 1.006  | 1.190  | 0.980  | 1.010  | 1.002  |
| <i>A. vulgaris</i>   | poly       | 0.920  | 1.239  | 0.693  | 1.926  | 0.806  | 1.025  | 1.091  |
|                      | div        | 0.977  | 0.971  | 1.005  | 1.189  | 0.982  | 1.008  | 1.001  |
| <i>A. sibirica</i>   | poly       | 0.681  | 0.436  | 2.489  | 1.055  | 1.034  | 0.317  | 0.838  |
|                      | div        | 0.979  | 0.970  | 1.003  | 1.205  | 0.979  | 1.004  | 1.003  |
| <i>A. formosa</i>    | poly       | 0.958  | 0.996  | 1.020  | 1.641  | 0.927  | 0.879  | 1.003  |
|                      | div        | 0.976  | 0.973  | 1.004  | 1.205  | 0.970  | 1.012  | 1.006  |
| <i>A. japonica</i>   | poly       | 0.931  | 1.031  | 0.884  | 1.790  | 0.984  | 1.080  | 0.868  |
|                      | div        | 0.977  | 0.962  | 1.005  | 1.204  | 0.984  | 1.008  | 1.002  |
| <i>A. oxysepala</i>  | poly       | 1.627  | 0.661  | 0.542  | 6.182  | 0.495  | 0.350  | 0.424  |
|                      | div        | 0.974  | 0.969  | 1.001  | 1.192  | 0.987  | 1.007  | 1.006  |
| <i>A. longissima</i> | poly       | 1.630  | 0.649  | 0.691  | 2.780  | 0.872  | 0.486  | 0.869  |
|                      | div        | 0.974  | 0.971  | 1.001  | 1.205  | 0.977  | 1.011  | 1.005  |
| <i>A. chrysantha</i> | poly       | 0.936  | 1.051  | 0.979  | 1.776  | 0.928  | 0.913  | 0.946  |
|                      | div        | 0.975  | 0.972  | 1.002  | 1.211  | 0.974  | 1.015  | 1.002  |
| mean                 | poly       | 0.986  | 0.887  | 1.025  | 2.258  | 0.919  | 0.895  | 0.858  |
|                      | div        | 0.975  | 0.970  | 1.004  | 1.201  | 0.978  | 1.011  | 1.004  |
