# Supplementary material for: The Aquilegia genome provides insight into adaptive radiation and reveals an extraordinarily polymorphic chromosome with a unique history
Source: PubMed Central journal article supplement (PMC6255393; doi:10.7554/elife.36426), 2018-10-16
Supplement: elife-36426-supp7.pdf [file elife-36426-supp7.pdf]

**Supplementary File 7.** Robustness of nucleotide diversity patterns to copy number variant detection methods.

| Method                | Species              | Percent nucleotide diversity |       |       |       |       |       |       | Genome |
|-----------------------|----------------------|------------------------------|-------|-------|-------|-------|-------|-------|--------|
|                       |                      | Chromosome                   |       |       |       |       |       |       |        |
|                       |                      | 1                            | 2     | 3     | 4     | 5     | 6     | 7     |        |
| 0.15log cov           | <i>A. pubescens</i>  | 0.027                        | 0.097 | 0.092 | 0.151 | 0.098 | 0.092 | 0.096 | 0.084  |
|                       | <i>A. barnebyi</i>   | 0.053                        | 0.055 | 0.046 | 0.086 | 0.050 | 0.046 | 0.047 | 0.051  |
|                       | <i>A. aurea</i>      | 0.009                        | 0.005 | 0.005 | 0.001 | 0.012 | 0.017 | 0.001 | 0.007  |
|                       | <i>A. vulgaris</i>   | 0.103                        | 0.120 | 0.071 | 0.156 | 0.087 | 0.103 | 0.113 | 0.101  |
|                       | <i>A. sibirica</i>   | 0.018                        | 0.005 | 0.084 | 0.033 | 0.025 | 0.005 | 0.017 | 0.027  |
|                       | <i>A. formosa</i>    | 0.123                        | 0.112 | 0.116 | 0.165 | 0.111 | 0.122 | 0.112 | 0.118  |
|                       | <i>A. japonica</i>   | 0.144                        | 0.152 | 0.143 | 0.247 | 0.149 | 0.151 | 0.144 | 0.151  |
|                       | <i>A. oxysepala</i>  | 0.042                        | 0.005 | 0.002 | 0.116 | 0.002 | 0.001 | 0.001 | 0.015  |
|                       | <i>A. longissima</i> | 0.029                        | 0.007 | 0.008 | 0.037 | 0.010 | 0.003 | 0.013 | 0.014  |
| <i>A. chrysantha</i>  | 0.097                | 0.106                        | 0.088 | 0.161 | 0.097 | 0.087 | 0.095 | 0.098 |        |
| CNV detection         | <i>A. pubescens</i>  | 0.094                        | 0.332 | 0.316 | 0.446 | 0.289 | 0.293 | 0.290 | 0.264  |
|                       | <i>A. barnebyi</i>   | 0.196                        | 0.195 | 0.182 | 0.351 | 0.201 | 0.197 | 0.192 | 0.198  |
|                       | <i>A. aurea</i>      | 0.030                        | 0.025 | 0.023 | 0.017 | 0.025 | 0.055 | 0.013 | 0.027  |
|                       | <i>A. vulgaris</i>   | 0.225                        | 0.295 | 0.132 | 0.343 | 0.190 | 0.241 | 0.245 | 0.223  |
|                       | <i>A. sibirica</i>   | 0.055                        | 0.020 | 0.169 | 0.034 | 0.091 | 0.028 | 0.061 | 0.072  |
|                       | <i>A. formosa</i>    | 0.305                        | 0.316 | 0.317 | 0.436 | 0.301 | 0.307 | 0.316 | 0.314  |
|                       | <i>A. japonica</i>   | 0.307                        | 0.305 | 0.275 | 0.551 | 0.309 | 0.345 | 0.296 | 0.312  |
|                       | <i>A. oxysepala</i>  | 0.099                        | 0.033 | 0.027 | 0.251 | 0.020 | 0.015 | 0.018 | 0.046  |
|                       | <i>A. longissima</i> | 0.079                        | 0.032 | 0.026 | 0.107 | 0.033 | 0.022 | 0.040 | 0.043  |
| <i>A. chrysantha</i>  | 0.306                | 0.318                        | 0.282 | 0.421 | 0.305 | 0.301 | 0.305 | 0.306 |        |
| Tandem duplicates     | <i>A. pubescens</i>  | 0.082                        | 0.340 | 0.324 | 0.473 | 0.322 | 0.288 | 0.305 | 0.282  |
|                       | <i>A. barnebyi</i>   | 0.191                        | 0.197 | 0.191 | 0.364 | 0.200 | 0.176 | 0.190 | 0.200  |
|                       | <i>A. aurea</i>      | 0.029                        | 0.027 | 0.024 | 0.035 | 0.043 | 0.046 | 0.016 | 0.031  |
|                       | <i>A. vulgaris</i>   | 0.214                        | 0.293 | 0.164 | 0.403 | 0.198 | 0.217 | 0.238 | 0.228  |
|                       | <i>A. sibirica</i>   | 0.054                        | 0.033 | 0.184 | 0.103 | 0.073 | 0.030 | 0.063 | 0.077  |
|                       | <i>A. formosa</i>    | 0.321                        | 0.325 | 0.320 | 0.483 | 0.318 | 0.309 | 0.321 | 0.328  |
|                       | <i>A. japonica</i>   | 0.296                        | 0.314 | 0.287 | 0.571 | 0.299 | 0.317 | 0.296 | 0.314  |
|                       | <i>A. oxysepala</i>  | 0.102                        | 0.037 | 0.027 | 0.319 | 0.023 | 0.018 | 0.022 | 0.055  |
|                       | <i>A. longissima</i> | 0.079                        | 0.030 | 0.037 | 0.137 | 0.039 | 0.018 | 0.041 | 0.047  |
| <i>A. chrysantha</i>  | 0.304                | 0.329                        | 0.291 | 0.496 | 0.302 | 0.298 | 0.312 | 0.315 |        |
| Allele ratio in reads | <i>A. pubescens</i>  | 0.045                        | 0.201 | 0.254 | 0.471 | 0.321 | 0.289 | 0.305 | 0.241  |
|                       | <i>A. barnebyi</i>   | 0.139                        | 0.135 | 0.155 | 0.370 | 0.198 | 0.179 | 0.190 | 0.176  |
|                       | <i>A. aurea</i>      | 0.012                        | 0.007 | 0.012 | 0.039 | 0.044 | 0.047 | 0.018 | 0.023  |
|                       | <i>A. vulgaris</i>   | 0.162                        | 0.224 | 0.127 | 0.408 | 0.204 | 0.219 | 0.241 | 0.204  |
|                       | <i>A. sibirica</i>   | 0.031                        | 0.010 | 0.153 | 0.108 | 0.074 | 0.030 | 0.066 | 0.065  |
|                       | <i>A. formosa</i>    | 0.243                        | 0.230 | 0.273 | 0.476 | 0.318 | 0.308 | 0.320 | 0.290  |
|                       | <i>A. japonica</i>   | 0.225                        | 0.234 | 0.247 | 0.579 | 0.298 | 0.320 | 0.297 | 0.283  |
|                       | <i>A. oxysepala</i>  | 0.066                        | 0.009 | 0.012 | 0.329 | 0.025 | 0.019 | 0.024 | 0.043  |
|                       | <i>A. longissima</i> | 0.057                        | 0.016 | 0.027 | 0.139 | 0.040 | 0.019 | 0.041 | 0.040  |
| <i>A. chrysantha</i>  | 0.226                | 0.232                        | 0.249 | 0.495 | 0.303 | 0.296 | 0.310 | 0.279 |        |
