# Supplementary material for: The Aquilegia genome provides insight into adaptive radiation and reveals an extraordinarily polymorphic chromosome with a unique history
Source: PubMed Central journal article supplement (PMC6255393; doi:10.7554/elife.36426), 2018-10-16
Supplement: elife-36426-supp8.pdf [file elife-36426-supp8.pdf]

**Supplementary File 8.** Repeat family prevalence and permutation results in the *A. coerulea* v3.1 genome release.

| Family             | Observed<br>copy number<br>on Chr_04 | Number of<br>permutations<br>with fewer | Number of<br>permutations<br>with more | Number of<br>permutations<br>with same |
|--------------------|--------------------------------------|-----------------------------------------|----------------------------------------|----------------------------------------|
| DNA CMC-EnSpm      | 443                                  | 1000                                    | 0                                      | 0                                      |
| DNA TcMar-Pogo     | 637                                  | 1000                                    | 0                                      | 0                                      |
| DNA hAT-Tip100     | 49                                   | 1000                                    | 0                                      | 0                                      |
| LINE CRE-II        | 1109                                 | 1000                                    | 0                                      | 0                                      |
| LINE L1            | 2038                                 | 1000                                    | 0                                      | 0                                      |
| LINE Tad1          | 90                                   | 1000                                    | 0                                      | 0                                      |
| LTR                | 377                                  | 1000                                    | 0                                      | 0                                      |
| LTR Copia          | 4341                                 | 1000                                    | 0                                      | 0                                      |
| LTR Gypsy          | 4097                                 | 1000                                    | 0                                      | 0                                      |
| SINE tRNA          | 1173                                 | 1000                                    | 0                                      | 0                                      |
| Unknown            | 28188                                | 1000                                    | 0                                      | 0                                      |
| LINE L2            | 26                                   | 994                                     | 2                                      | 4                                      |
| LINE R1            | 52                                   | 998                                     | 2                                      | 0                                      |
| DNA hAT-Ac         | 1376                                 | 991                                     | 9                                      | 0                                      |
| DNA TcMar-Stowaway | 29                                   | 951                                     | 26                                     | 23                                     |
| DNA MuLE-MuDR      | 301                                  | 961                                     | 35                                     | 4                                      |
| LTR Caulimovirus   | 148                                  | 945                                     | 46                                     | 9                                      |
| Simple repeat      | 326                                  | 935                                     | 57                                     | 8                                      |
| DNA Maverick       | 27                                   | 910                                     | 64                                     | 26                                     |
| LTR Ngaro          | 13                                   | 864                                     | 68                                     | 68                                     |
| Satellite          | 41                                   | 828                                     | 130                                    | 42                                     |
| rRNA               | 42                                   | 811                                     | 145                                    | 44                                     |
| DNA hAT            | 41                                   | 719                                     | 229                                    | 52                                     |
| LTR ERVK           | 18                                   | 665                                     | 247                                    | 88                                     |
| LINE RTE-BovB      | 14                                   | 579                                     | 305                                    | 116                                    |
| snRNA              | 12                                   | 557                                     | 311                                    | 132                                    |
| DNA MULE-MuDR      | 299                                  | 659                                     | 323                                    | 18                                     |
| RC Helitron        | 135                                  | 340                                     | 624                                    | 36                                     |
| DNA Crypton        | 11                                   | 250                                     | 641                                    | 109                                    |
| SINE?              | 80                                   | 259                                     | 700                                    | 41                                     |
| DNA PIF-Harbinger  | 270                                  | 135                                     | 848                                    | 17                                     |
| DNA TcMar          | 51                                   | 102                                     | 863                                    | 35                                     |
| LTR ERV1           | 63                                   | 48                                      | 942                                    | 10                                     |
| DNA                | 16                                   | 2                                       | 992                                    | 6                                      |
| DNA hAT-Tag1       | 381                                  | 6                                       | 993                                    | 1                                      |
| DNA Sola           | 1                                    | 0                                       | 996                                    | 4                                      |
| LINE L1-Tx1        | 4                                    | 0                                       | 999                                    | 1                                      |
| DNA Dada           | 0                                    | 0                                       | 1000                                   | 0                                      |
