# Supplementary material for: The Aquilegia genome provides insight into adaptive radiation and reveals an extraordinarily polymorphic chromosome with a unique history
Source: PubMed Central journal article supplement (PMC6255393; doi:10.7554/elife.36426), 2018-10-16
Supplement: elife-36426-supp9.pdf [file elife-36426-supp9.pdf]

**Supplementary File 9.** *K*-mer based estimates of genome size and repetitive sequence proportion

| Geographic region | Species              | Genome size (bp) | Proportion repetitive |
|-------------------|----------------------|------------------|-----------------------|
| North America     | <i>A. pubescens</i>  | 327739099        | 0.473                 |
|                   | <i>A. formosa</i>    | 320736307        | 0.442                 |
|                   | <i>A. barnebyi</i>   | 314243005        | 0.449                 |
|                   | <i>A. longissima</i> | 315526747        | 0.452                 |
|                   | <i>A. chrysantha</i> | 327663698        | 0.443                 |
| Europe            | <i>A. aurea</i>      | 301759711        | 0.443                 |
|                   | <i>A. vulgaris</i>   | 298726981        | 0.419                 |
| Asia              | <i>A. sibirica</i>   | 289831630        | 0.417                 |
|                   | <i>A. flabellata</i> | 284394029        | 0.402                 |
|                   | <i>A. oxysepala</i>  | 316478823        | 0.452                 |
