# Supplementary material for: The Aquilegia genome provides insight into adaptive radiation and reveals an extraordinarily polymorphic chromosome with a unique history
Source: PubMed Central journal article supplement (PMC6255393; doi:10.7554/elife.36426), 2018-10-16
Supplement: elife-36426-supp10.pdf [file elife-36426-supp10.pdf]

**Supplementary File 10.** Mean and median coverage by species.

| Species                        | Mean coverage | Median coverage |
|--------------------------------|---------------|-----------------|
| <i>A. pubescens</i>            | 58            | 46              |
| <i>A. barnebyi</i>             | 105           | 88              |
| <i>A. aurea</i>                | 116           | 97              |
| <i>A. vulgaris</i>             | 122           | 93              |
| <i>A. sibirica</i>             | 112           | 91              |
| <i>A. formosa</i>              | 122           | 100             |
| <i>A. japonica</i>             | 124           | 100             |
| <i>A. oxysepala</i>            | 116           | 87              |
| <i>A. longissima</i>           | 116           | 94              |
| <i>A. chrysantha</i>           | 116           | 94              |
| <i>Semiaquilegia adoxoides</i> | 74            | 31              |
