# Supplementary material for: The Aquilegia genome provides insight into adaptive radiation and reveals an extraordinarily polymorphic chromosome with a unique history
Source: PubMed Central journal article supplement (PMC6255393; doi:10.7554/elife.36426), 2018-10-16
Supplement: elife-36426-supp11.pdf [file elife-36426-supp11.pdf]

**Supplementary File 11.** Proportion of sites removed by each filter (sites can have more than one filter) by chromosome - for initial filtration without Semi.

| Chr    | HCov* | INDEL | JGIREP | MINCOV | MissCall | RepMask | MULTI | Unfiltered |
|--------|-------|-------|--------|--------|----------|---------|-------|------------|
| Chr_01 | 0.096 | 0.216 | 0.373  | 0.447  | 0.309    | 0.029   | 0.002 | 0.264      |
| Chr_02 | 0.101 | 0.212 | 0.394  | 0.476  | 0.311    | 0.028   | 0.002 | 0.227      |
| Chr_03 | 0.099 | 0.214 | 0.375  | 0.462  | 0.291    | 0.029   | 0.002 | 0.245      |
| Chr_04 | 0.076 | 0.230 | 0.520  | 0.702  | 0.461    | 0.028   | 0.003 | 0.071      |
| Chr_05 | 0.099 | 0.215 | 0.379  | 0.464  | 0.301    | 0.029   | 0.002 | 0.250      |
| Chr_06 | 0.103 | 0.213 | 0.377  | 0.478  | 0.330    | 0.030   | 0.002 | 0.240      |
| Chr_07 | 0.110 | 0.212 | 0.389  | 0.486  | 0.328    | 0.029   | 0.002 | 0.220      |

\*Hcov=coverage less than 0.5x log median coverage or greater than -0.5x log median coverage, INDEL= indel and +/-10bp, JGIREP=repetitive sequence, MINCOV= coverage <15, MissCall=call missing in any species, RepMask=removed by RepeatMasker, MULTI=multiallelic, Unfiltered=site retained in data
