# Supplementary material for: The Aquilegia genome provides insight into adaptive radiation and reveals an extraordinarily polymorphic chromosome with a unique history
Source: PubMed Central journal article supplement (PMC6255393; doi:10.7554/elife.36426), 2018-10-16
Supplement: elife-36426-supp12.pdf [file elife-36426-supp12.pdf]

**Supplementary File 12.** Proportion of sites removed by each filter (sites can have more than one filter) by chromosome - for final filtration with *Semiaquilegia*.

| Chr    | HCov* | INDEL | JGIREP | MINCOV | MissCall | RepMask | MULTI | Unfiltered |
|--------|-------|-------|--------|--------|----------|---------|-------|------------|
| Chr_01 | 0.089 | 0.272 | 0.373  | 0.541  | 0.391    | 0.029   | 0.003 | 0.205      |
| Chr_02 | 0.091 | 0.265 | 0.394  | 0.575  | 0.398    | 0.028   | 0.003 | 0.176      |
| Chr_03 | 0.090 | 0.268 | 0.375  | 0.559  | 0.379    | 0.029   | 0.003 | 0.189      |
| Chr_04 | 0.054 | 0.270 | 0.520  | 0.800  | 0.572    | 0.028   | 0.004 | 0.049      |
| Chr_05 | 0.093 | 0.271 | 0.379  | 0.546  | 0.378    | 0.029   | 0.004 | 0.195      |
| Chr_06 | 0.094 | 0.269 | 0.377  | 0.561  | 0.407    | 0.030   | 0.003 | 0.186      |
| Chr_07 | 0.098 | 0.265 | 0.389  | 0.577  | 0.413    | 0.029   | 0.003 | 0.170      |

\*Hcov=coverage less than 0.5x log median coverage or greater than -0.5x log median coverage, INDEL= indel and +/-10bp, JGIREP=repetitive sequence, MINCOV= coverage <15, MissCall=call missing in any species, RepMask=removed by RepeatMasker, MULTI=multiallelic, Unfiltered=site retained in data
