# Supplementary material for: The Aquilegia genome provides insight into adaptive radiation and reveals an extraordinarily polymorphic chromosome with a unique history
Source: PubMed Central journal article supplement (PMC6255393; doi:10.7554/elife.36426), 2018-10-16
Supplement: elife-36426-supp13.pdf [file elife-36426-supp13.pdf]

**Supplementary File 13.** Number of derived variants by species.

| Geographic region | Species              | Number of variants |        |        |
|-------------------|----------------------|--------------------|--------|--------|
|                   |                      | Private            | Shared | Total  |
| Asia              | <i>A. japonica</i>   | 129211             | 205724 | 334935 |
|                   | <i>A. oxysepala</i>  | 134400             | 147923 | 282323 |
|                   | <i>A. sibirica</i>   | 99369              | 176177 | 275546 |
| Europe            | <i>A. aurea</i>      | 107824             | 176951 | 284775 |
|                   | <i>A. vulgaris</i>   | 139849             | 189526 | 329375 |
| North America     | <i>A. barnebyi</i>   | 75641              | 245644 | 321285 |
|                   | <i>A. chrysantha</i> | 87258              | 261239 | 348497 |
|                   | <i>A. formosa</i>    | 87823              | 266604 | 354427 |
|                   | <i>A. longissima</i> | 66344              | 232710 | 299054 |
|                   | <i>A. pubescens</i>  | 72661              | 265713 | 338374 |
