# Supplementary material for: The Aquilegia genome provides insight into adaptive radiation and reveals an extraordinarily polymorphic chromosome with a unique history
Source: PubMed Central journal article supplement (PMC6255393; doi:10.7554/elife.36426), 2018-10-16
Supplement: elife-36426-supp14.pdf [file elife-36426-supp14.pdf]

**Supplementary File 14.** Transition matrix for the Five-State Markov process.  $m_1$  denotes the probability of an *A. oxysepala* lineage being a migrant, while  $m_2$  denotes the probability of a *A. japonica* lineage being a migrant at a given generation.

|          | (1,1,1)       | (1,2,0)         | (1,0,2)         | (1,0,1) | (1,1,1)*      |
|----------|---------------|-----------------|-----------------|---------|---------------|
| (1,1,1)  | $1-(m_1+m_2)$ | $m_1$           | $m_2$           | 0       | 0             |
| (1,2,0)  | $m_2$         | $1-(2*m_2+1/N)$ | 0               | $1/N$   | $m_2$         |
| (1,0,2)  | $m_1$         | 0               | $1-(2*m_1+1/N)$ | $1/N$   | $m_1$         |
| (1,0,1)  | 0             | 0               | 0               | 1       | 0             |
| (1,1,1)* | 0             | $m_1$           | $m_2$           | 0       | $1-(m_1+m_2)$ |
