# Supplementary material for: The Aquilegia genome provides insight into adaptive radiation and reveals an extraordinarily polymorphic chromosome with a unique history
Source: PubMed Central journal article supplement (PMC6255393; doi:10.7554/elife.36426), 2018-10-16
Supplement: elife-36426-supp15.pdf [file elife-36426-supp15.pdf]

**Supplementary File 15.** Transition matrix for the Eight-State Markov process.  $X=(1-1/N)^T$  and  $Y=(1-3/N)^T$

|                      | (1,1,1) | (1,2,0) | (1,0,2) | (1,0,1) | (1,1,1) <sup>†</sup> | (0,1,1) | (1,1,0) | (1,1,1) <sup>*</sup> |
|----------------------|---------|---------|---------|---------|----------------------|---------|---------|----------------------|
| (1,1,1)              | 0       | 0       | 0       | 0       | X                    | 1-X     | 0       | 0                    |
| (1,2,0)              | 0       | 0       | 0       | (1-Y)/3 | Y                    | (1-Y)/3 | (1-Y)/3 | 0                    |
| (1,0,2)              | 0       | 0       | 0       | 1-X     | X                    | 0       | 0       | 0                    |
| (1,0,1)              | 0       | 0       | 0       | 1       | 0                    | 0       | 0       | 0                    |
| (1,1,1) <sup>†</sup> | 0       | 0       | 0       | 1/N     | 1-3/N                | 1/N     | 1/N     | 0                    |
| (0,1,1)              | 0       | 0       | 0       | 0       | 0                    | 1       | 0       | 0                    |
| (1,1,0)              | 0       | 0       | 0       | 0       | 0                    | 0       | 1       | 0                    |
| (1,1,1) <sup>*</sup> | 0       | 0       | 0       | 0       | X                    | 0       | 1-X     | 0                    |
