# Supplementary material for: The Aquilegia genome provides insight into adaptive radiation and reveals an extraordinarily polymorphic chromosome with a unique history
Source: eLife journal article supplement (doi:10.7554/elife.36426), 2018-10-16
Supplement: supp [file elife_poa_e36426_Figure_1_figure_supplement_1.pdf › elife_poa_e36426_Figure_1_figure_supplement_1.pdf]

**Figure 1-figure supplemental 1.** Origin of species samples used for sequencing.

| Species                                   | Native range  | Collection locality | Tissue source        |
|-------------------------------------------|---------------|---------------------|----------------------|
| <i>Aquilegia aurea</i>                    | Europe        | Bulgaria            | wild                 |
| <i>A. barnebyi</i>                        | North America | Colorado, USA       | grown from wild seed |
| <i>A. chrysantha</i>                      | North America | Arizona, USA        | wild                 |
| <i>A. formosa</i>                         | North America | California, USA     | wild                 |
| <i>A. japonica</i>                        | Asia          | Jilin, China        | wild                 |
| <i>A. longissima</i>                      | North America | Texas, USA          | unknown              |
| <i>A. oxysepala</i> var. <i>oxysepala</i> | Asia          | Heilongjiang, China | wild                 |
| <i>A. pubescens</i>                       | North America | California, USA     | wild                 |
| <i>A. sibirica</i>                        | Asia          | Khazakhstan         | grown from wild seed |
| <i>A. vulgaris</i>                        | Europe        | Switzerland         | wild                 |
| <i>Semiaquilegia adoxoides</i>            | Asia          | China               | grown from wild seed |
