# Supplementary material for: The Aquilegia genome provides insight into adaptive radiation and reveals an extraordinarily polymorphic chromosome with a unique history
Source: eLife journal article supplement (doi:10.7554/elife.36426), 2018-10-16

**Figure 2-figure supplemental 1. Polymorphism across the genome in all ten species samples.** Polymorphism in 1Mb windows across the genome for all ten species samples. Some samples show long stretches of homozygosity indicative of recent inbreeding; this inbreeding could explain the lack of increased polymorphism on chromosome four in *A. aurea*. Similarly, an extended stretch of homozygosity was seen on chromosome four in an additional sample of *A. pubescens* that was used in the construction of our F2 mapping population (**Figure 7-figure supplemental 2, sample pub.1**).

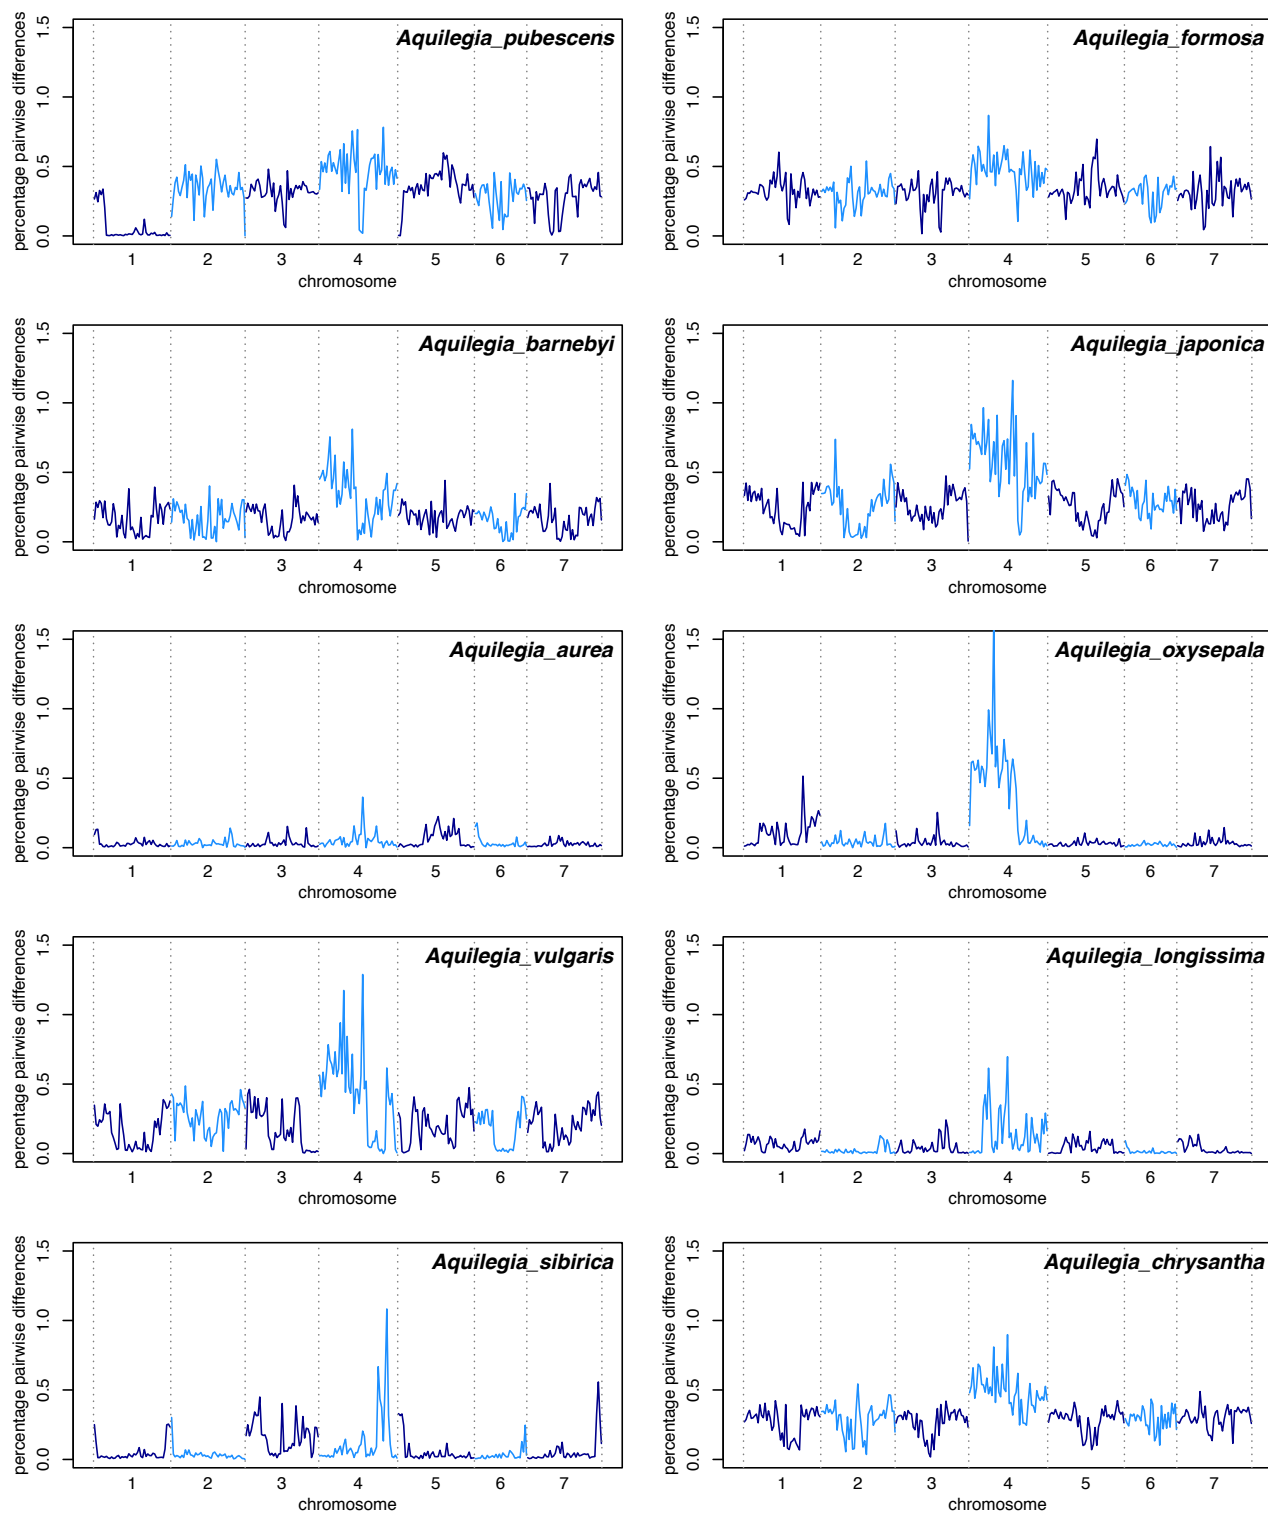

Supplement: supp [file elife_poa_e36426_Figure_2_figure_supplement_1.pdf › elife_poa_e36426_Figure_2_figure_supplement_1.pdf]
