# Supplementary material for: The Aquilegia genome provides insight into adaptive radiation and reveals an extraordinarily polymorphic chromosome with a unique history
Source: eLife journal article supplement (doi:10.7554/elife.36426), 2018-10-16

**Figure 2-figure supplemental 2. Species and chromosome trees of *Aquilegia*.** (a) RAxML tree from concatenated genomic data (b) Neighbor joining tree from concatenated chromosome four data (c) RAxML tree from concatenated chromosome four data. Bootstrap support values are presented for all trees

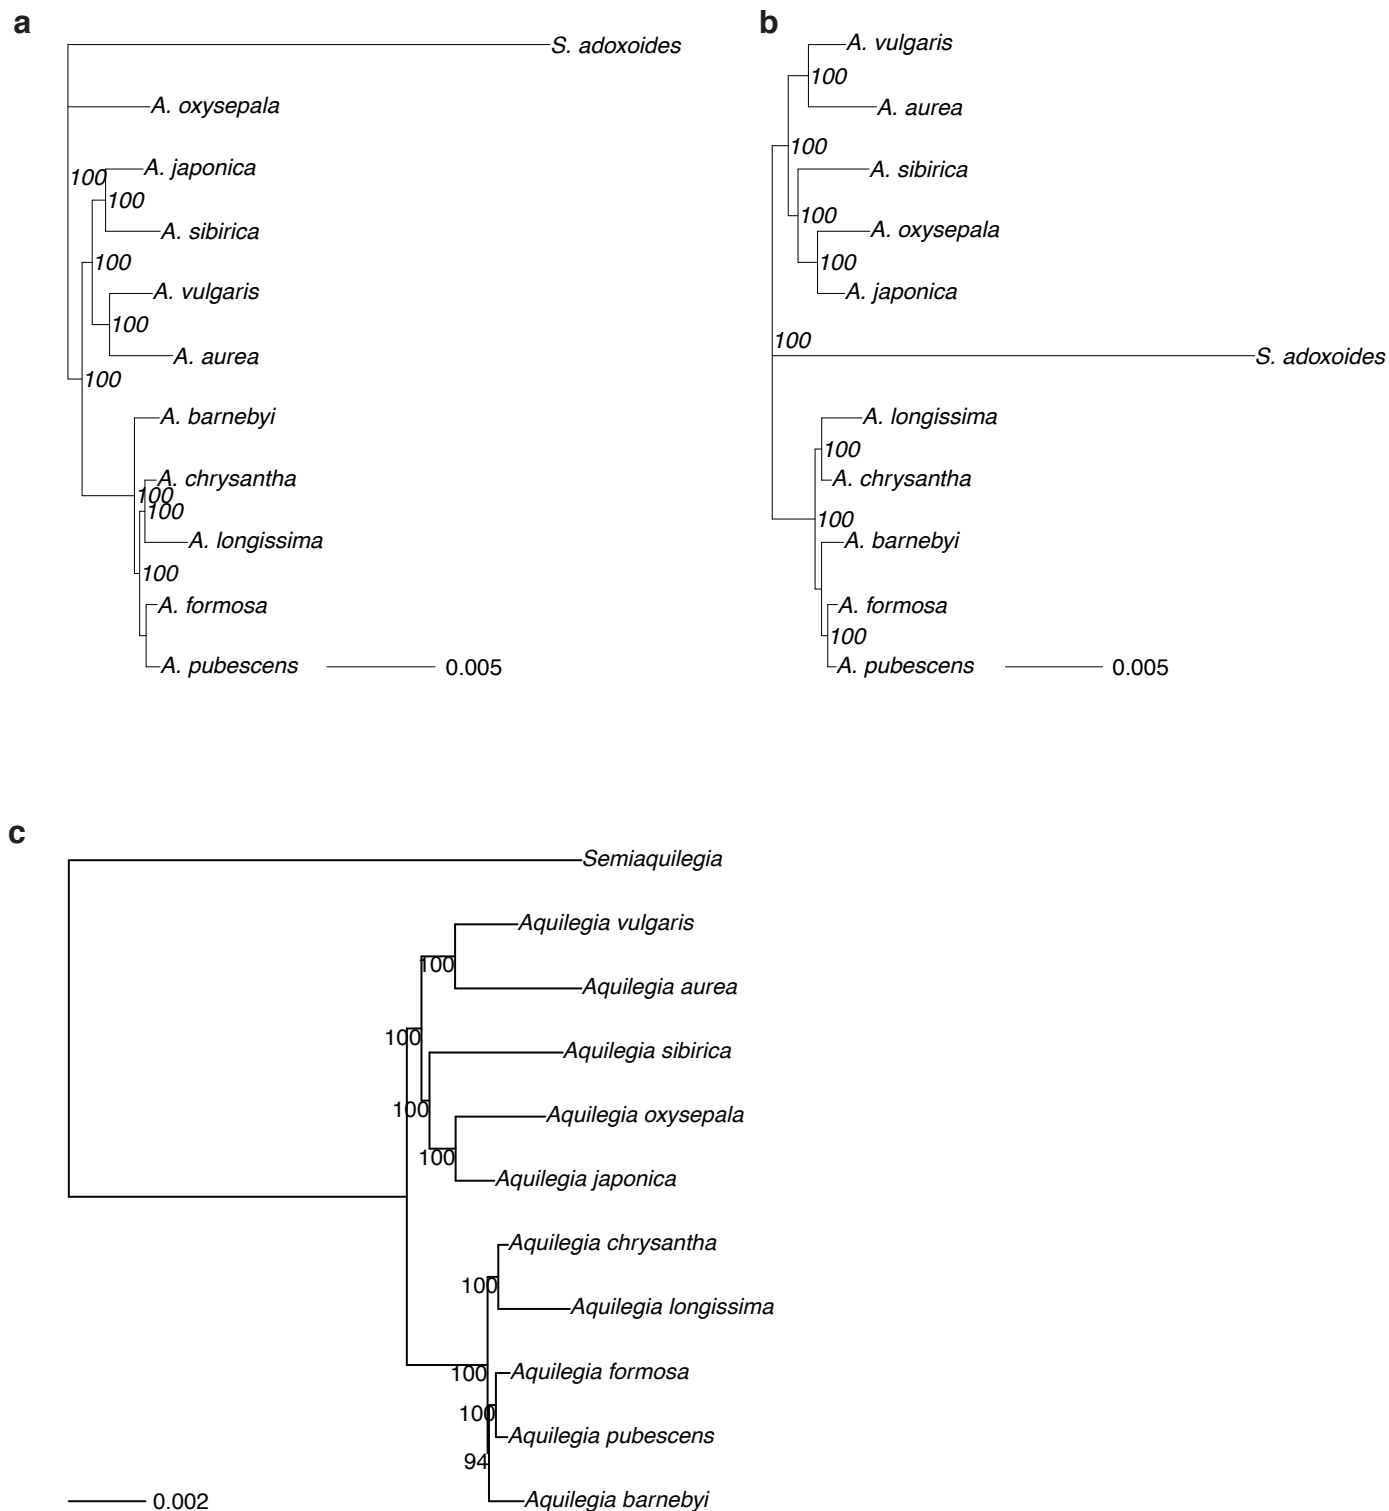

Supplement: supp [file elife_poa_e36426_Figure_2_figure_supplement_2.pdf › elife_poa_e36426_Figure_2_figure_supplement_2.pdf]
