# Supplementary material for: The Aquilegia genome provides insight into adaptive radiation and reveals an extraordinarily polymorphic chromosome with a unique history
Source: eLife journal article supplement (doi:10.7554/elife.36426), 2018-10-16
Supplement: supp [file elife_poa_e36426_Figure_3_figure_supplement_1.pdf › elife_poa_e36426_Figure_3_figure_supplement_1.pdf]

**Figure 3-figure supplemental 1.** Proportion of significantly-varying subtrees by chromosome  
- corrected for 217 tests

| Subtree             | Proportion of window trees with subtree |      |      |      |      |      |      | Genome | Corrected p-val |
|---------------------|-----------------------------------------|------|------|------|------|------|------|--------|-----------------|
|                     | Chromosome                              |      |      |      |      |      |      |        |                 |
|                     | 1                                       | 2    | 3    | 4    | 5    | 6    | 7    |        |                 |
| japon/sib           | 0.49                                    | 0.51 | 0.47 | 0.14 | 0.48 | 0.53 | 0.43 | 0.45   | 3.7E-19         |
| aur/japon/sib/vul   | 0.36                                    | 0.35 | 0.31 | 0.07 | 0.35 | 0.38 | 0.31 | 0.31   | 2.4E-12         |
| japon/oxy           | 0.23                                    | 0.24 | 0.29 | 0.47 | 0.25 | 0.19 | 0.22 | 0.26   | 3.6E-10         |
| oxy basal           | 0.37                                    | 0.29 | 0.27 | 0.10 | 0.32 | 0.36 | 0.31 | 0.30   | 7.0E-09         |
| N. Americans        | 0.02                                    | 0.05 | 0.02 | 0.11 | 0.03 | 0.02 | 0.05 | 0.04   | 3.0E-06         |
| aur/japon/oxy       | 0.01                                    | 0.01 | 0.01 | 0.05 | 0.00 | 0.00 | 0.00 | 0.01   | 2.6E-04         |
| bar/chr/for/lon/pub | 0.97                                    | 0.97 | 0.97 | 0.90 | 0.98 | 0.96 | 0.97 | 0.96   | 6.2E-03         |
| bar/pub             | 0.26                                    | 0.12 | 0.17 | 0.13 | 0.13 | 0.17 | 0.17 | 0.17   | 6.6E-03         |
| japon/oxy/sib       | 0.09                                    | 0.17 | 0.14 | 0.24 | 0.12 | 0.14 | 0.14 | 0.14   | 2.9E-02         |
| japon/sib/vul       | 0.10                                    | 0.06 | 0.05 | 0.02 | 0.08 | 0.11 | 0.10 | 0.07   | 3.9E-02         |
