# Supplementary material for: The Aquilegia genome provides insight into adaptive radiation and reveals an extraordinarily polymorphic chromosome with a unique history
Source: eLife journal article supplement (doi:10.7554/elife.36426), 2018-10-16

Figure 3-figure supplemental 3. Subtree prevalence across chromosomes for the nine significantly-different subtrees.

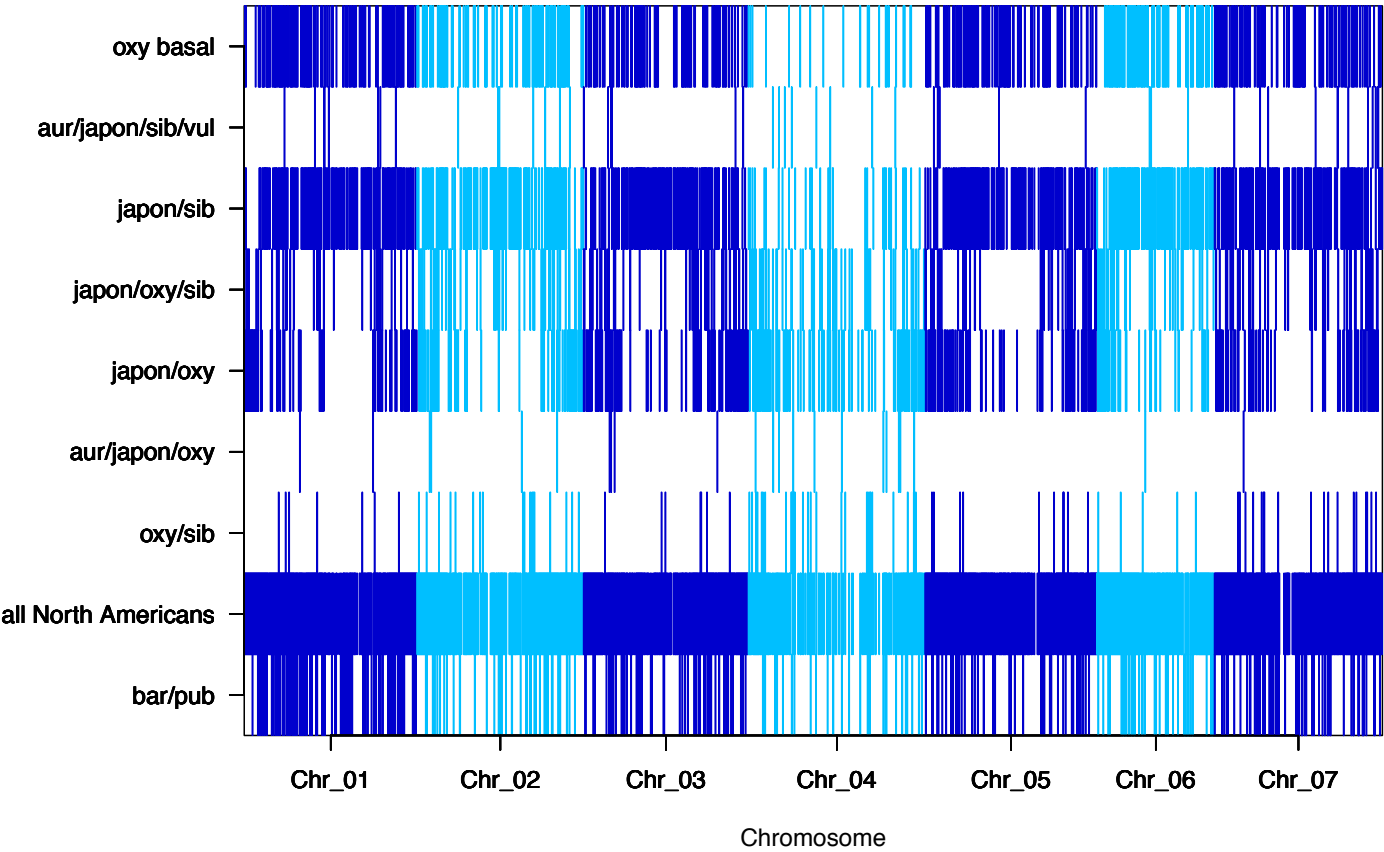

Supplement: supp [file elife_poa_e36426_Figure_3_figure_supplement_3.pdf › elife_poa_e36426_Figure_3_figure_supplement_3.pdf]
