# Supplementary material for: The Aquilegia genome provides insight into adaptive radiation and reveals an extraordinarily polymorphic chromosome with a unique history
Source: eLife journal article supplement (doi:10.7554/elife.36426), 2018-10-16
Supplement: supp [file elife_poa_e36426_Figure_4_figure_supplement_1.pdf › elife_poa_e36426_Figure_4_figure_supplement_1.pdf]

**Figure 4-figure supplemental 1.** Sharing pattern percentages by pattern type

| Sharing depth | Sharing pattern | Percentage of shared variants |      |      |      |      |      |      |        |
|---------------|-----------------|-------------------------------|------|------|------|------|------|------|--------|
|               |                 | Chromosome                    |      |      |      |      |      |      | genome |
|               |                 | 1                             | 2    | 3    | 4    | 5    | 6    | 7    |        |
| shallow       | within N.Am     | 36.4                          | 36.8 | 37.8 | 32.9 | 37.4 | 36.7 | 37.2 | 36.8   |
|               | within Asia     | 10.7                          | 10.6 | 11.0 | 12.7 | 10.6 | 10.7 | 10.1 | 10.8   |
|               | within Europe   | 5.5                           | 5.1  | 4.4  | 5.2  | 4.7  | 5.2  | 4.6  | 4.9    |
| deep          | N.Am and Asia   | 7.4                           | 7.1  | 7.1  | 7.6  | 7.2  | 6.8  | 7.0  | 7.1    |
|               | Europe and N.Am | 3.3                           | 3.6  | 3.7  | 3.7  | 3.3  | 3.9  | 3.3  | 3.5    |
|               | Europe and Asia | 14.7                          | 14.2 | 14.7 | 13.2 | 15.1 | 14.5 | 15.5 | 14.7   |
| very deep     | among all       | 22.0                          | 22.6 | 21.4 | 24.6 | 21.7 | 22.3 | 22.2 | 22.2   |
