# Supplementary material for: The Aquilegia genome provides insight into adaptive radiation and reveals an extraordinarily polymorphic chromosome with a unique history
Source: eLife journal article supplement (doi:10.7554/elife.36426), 2018-10-16

**Figure 6-figure supplemental 2.** Tree topology proportions simulated under assymmetric and unidirectional models

| gene flow      | m                    | N     | sib-japon | japon-oxy | sib-oxy | D-stat |
|----------------|----------------------|-------|-----------|-----------|---------|--------|
| asymmetric     | $2 \times 10^{-5}$   | 8333  | 0.53      | 0.31      | 0.15    | 0.35   |
|                | $2 \times 10^{-5}$   | 16666 | 0.41      | 0.40      | 0.18    | 0.38   |
|                | $4 \times 10^{-5}$   | 16666 | 0.30      | 0.49      | 0.21    | 0.40   |
|                | $2 \times 10^{-5}$   | 33332 | 0.30      | 0.49      | 0.21    | 0.40   |
| unidirectional | $5 \times 10^{-5}$   | 10000 | 0.53      | 0.30      | 0.15    | 0.33   |
|                | $5 \times 10^{-5}$   | 20000 | 0.40      | 0.43      | 0.17    | 0.43   |
|                | $7.5 \times 10^{-5}$ | 20000 | 0.31      | 0.51      | 0.17    | 0.50   |
|                | $5 \times 10^{-5}$   | 30000 | 0.31      | 0.51      | 0.17    | 0.50   |

**Figure 8-figure supplemental 1. Immunodetection of anti-5mC antibody (pink), and FISH of 35S rDNA (green) and oligoCh4 (red) probes on mitotic and pachytene chromosomes in *Semiaquilegia adoxoides*, *Aquilegia vulgaris* and *A. formosa*.** Chromosomes were counterstained with DAPI and inverted using Photo-shop CS software (Adobe Systems). Scale bars = 10  $\mu$ m.

*Semiaquilegia adoxoides*

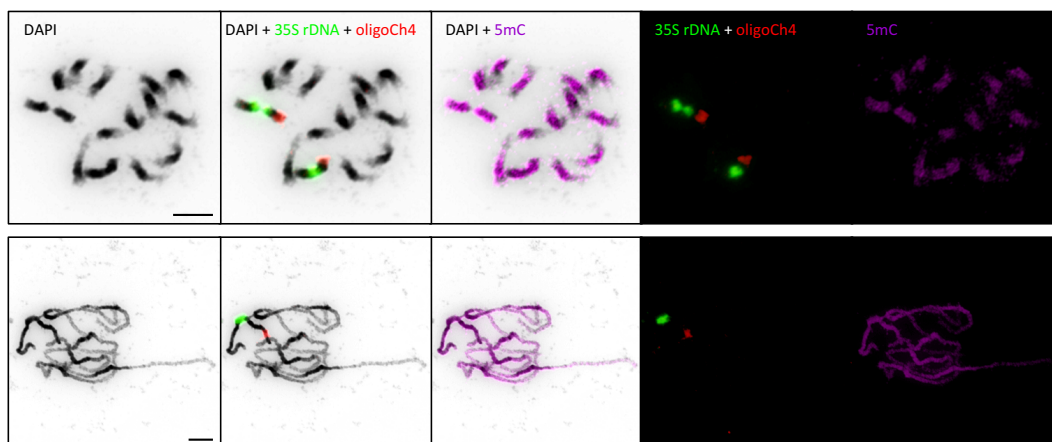

*Aquilegia vulgaris*

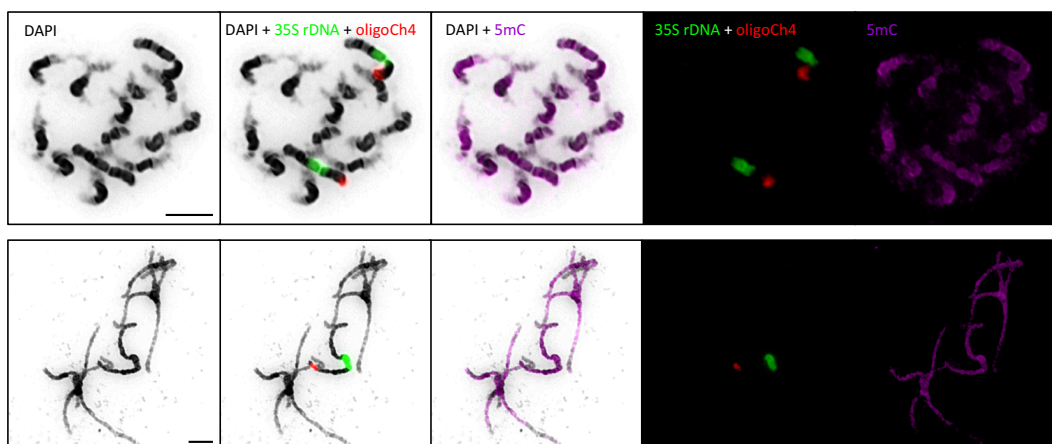

*Aquilegia formosa*

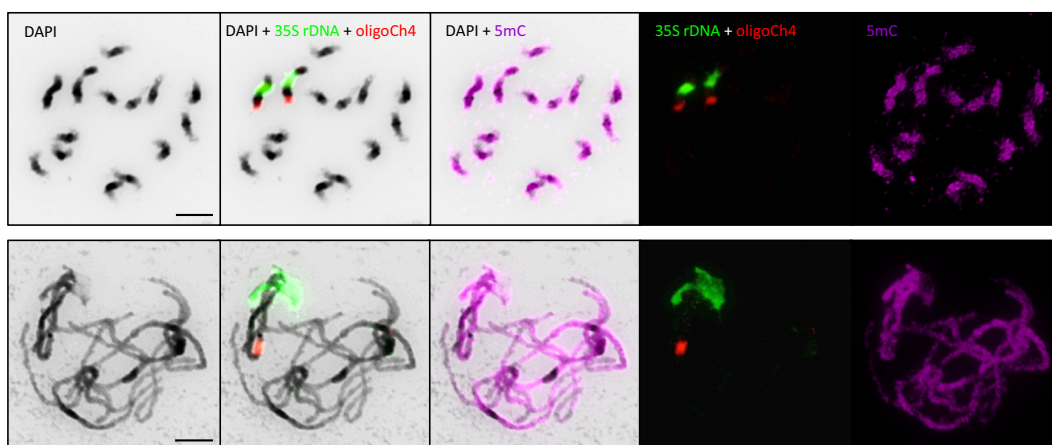

Supplement: supp [file elife_poa_e36426_Figure_6_figure_supplement_2.pdf › elife_poa_e36426_Figure_6_figure_supplement_2.pdf]
