# Supplementary material for: The Aquilegia genome provides insight into adaptive radiation and reveals an extraordinarily polymorphic chromosome with a unique history
Source: eLife journal article supplement (doi:10.7554/elife.36426), 2018-10-16

**Figure 7-figure supplemental 1. Polymorphism in the *A. formosa* x *A. pubescens* mapping population.**

(a) Polymorphism by chromosome for mapping population F0s (form.1, form.2, pub.1, and pub.2) and their corresponding F1s (F1.1 and F1.2). Samples form.2 and pub.2 were included in the main data set as *A. formosa* and *A. pubescens*; they are presented again in this figure for clarity. Although polymorphism was not elevated on chromosome four in pub.1, polymorphism was elevated in an F1 constructed using this individual (F1.1). (c) Polymorphism across the genome in 1MB windows for the samples in (a). A large inbred region observed on chromosome four in F1.1 suggests that inbreeding is the cause of the non-elevated polymorphism in this sample.

**a**

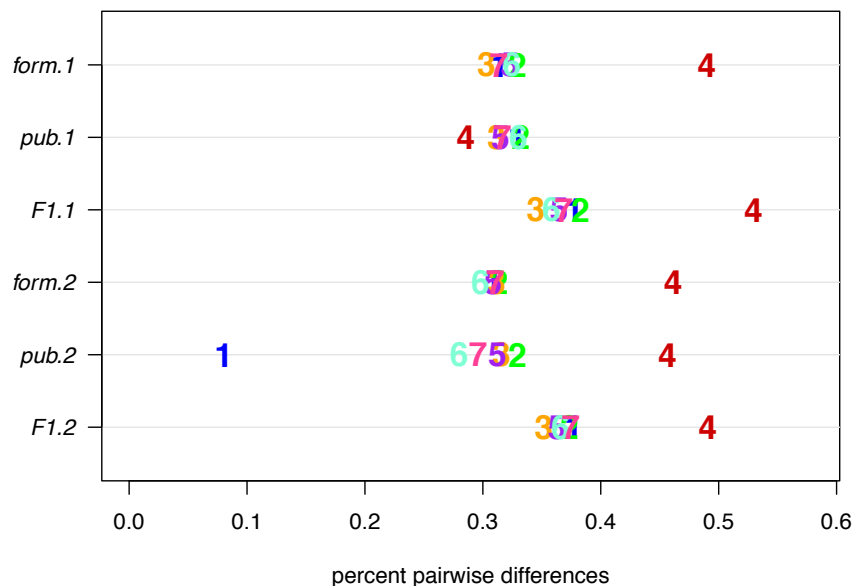

**b**

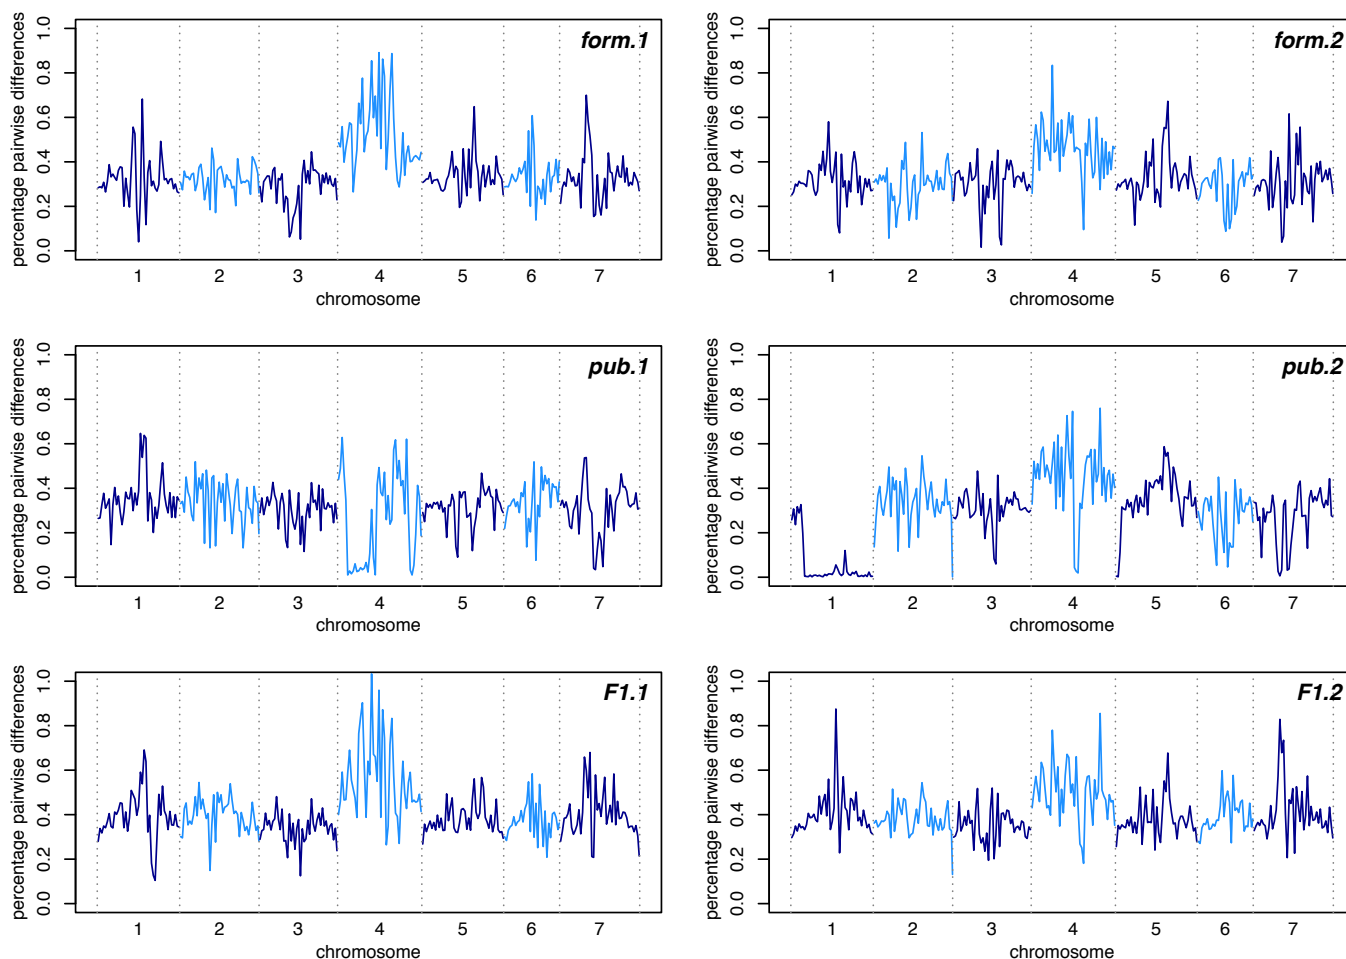

Supplement: supp [file elife_poa_e36426_Figure_7_figure_supplement_1.pdf › elife_poa_e36426_Figure_7_figure_supplement_1.pdf]
