# Supplementary material for: The Aquilegia genome provides insight into adaptive radiation and reveals an extraordinarily polymorphic chromosome with a unique history
Source: eLife journal article supplement (doi:10.7554/elife.36426), 2018-10-16

**Figure 8-figure supplemental 1. Immunodetection of anti-5mC antibody (pink), and FISH of 35S rDNA (green) and oligoCh4 (red) probes on mitotic and pachytene chromosomes in *Semiaquilegia adoxoides*, *Aquilegia vulgaris* and *A. formosa*.** Chromosomes were counterstained with DAPI and inverted using Photo-shop CS software (Adobe Systems). Scale bars = 10  $\mu$ m.

*Semiaquilegia adoxoides*

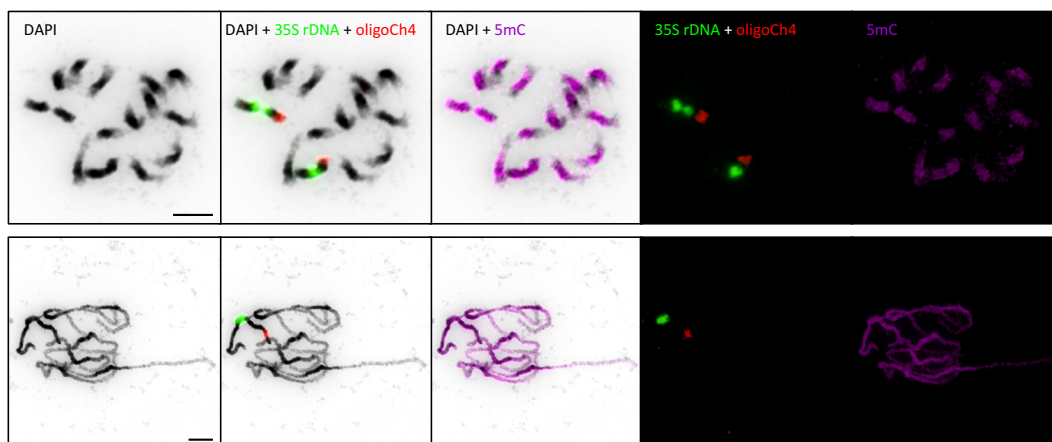

*Aquilegia vulgaris*

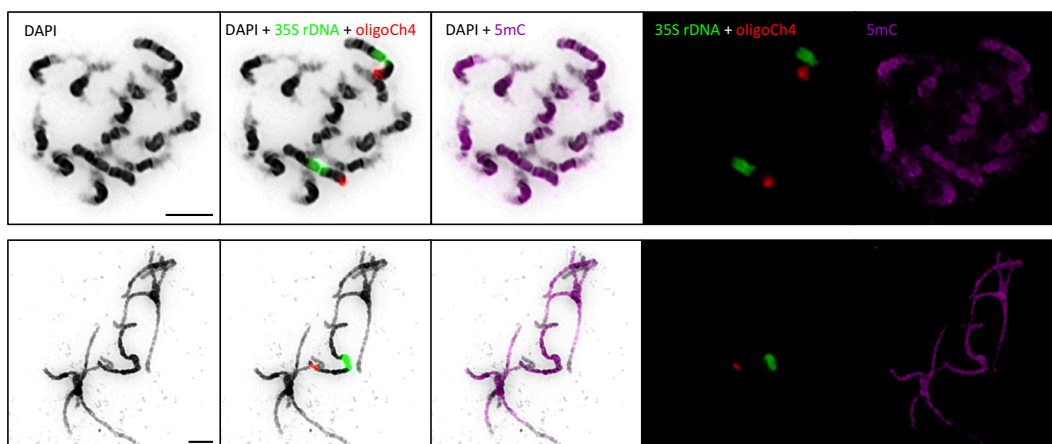

*Aquilegia formosa*

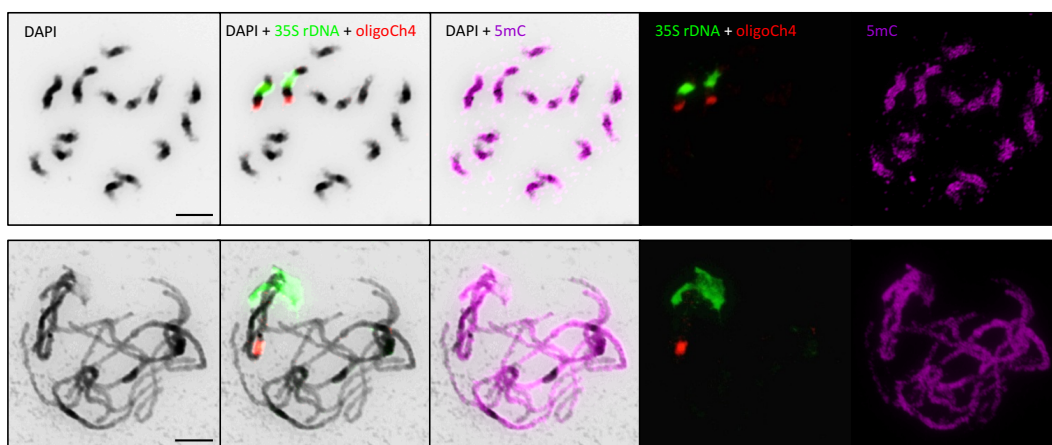

Supplement: supp [file elife_poa_e36426_Figure_8_figure_supplement_1.pdf › elife_poa_e36426_Figure_8_figure_supplement_1.pdf]
