# Supplementary figures and images for: The Aquilegia genome provides insight into adaptive radiation and reveals an extraordinarily polymorphic chromosome with a unique history
Source: eLife journal article supplement (doi:10.7554/elife.36426), 2018-10-16

Figure 7-figure supplemental 2. Distribution of gene expression values by chromosome.

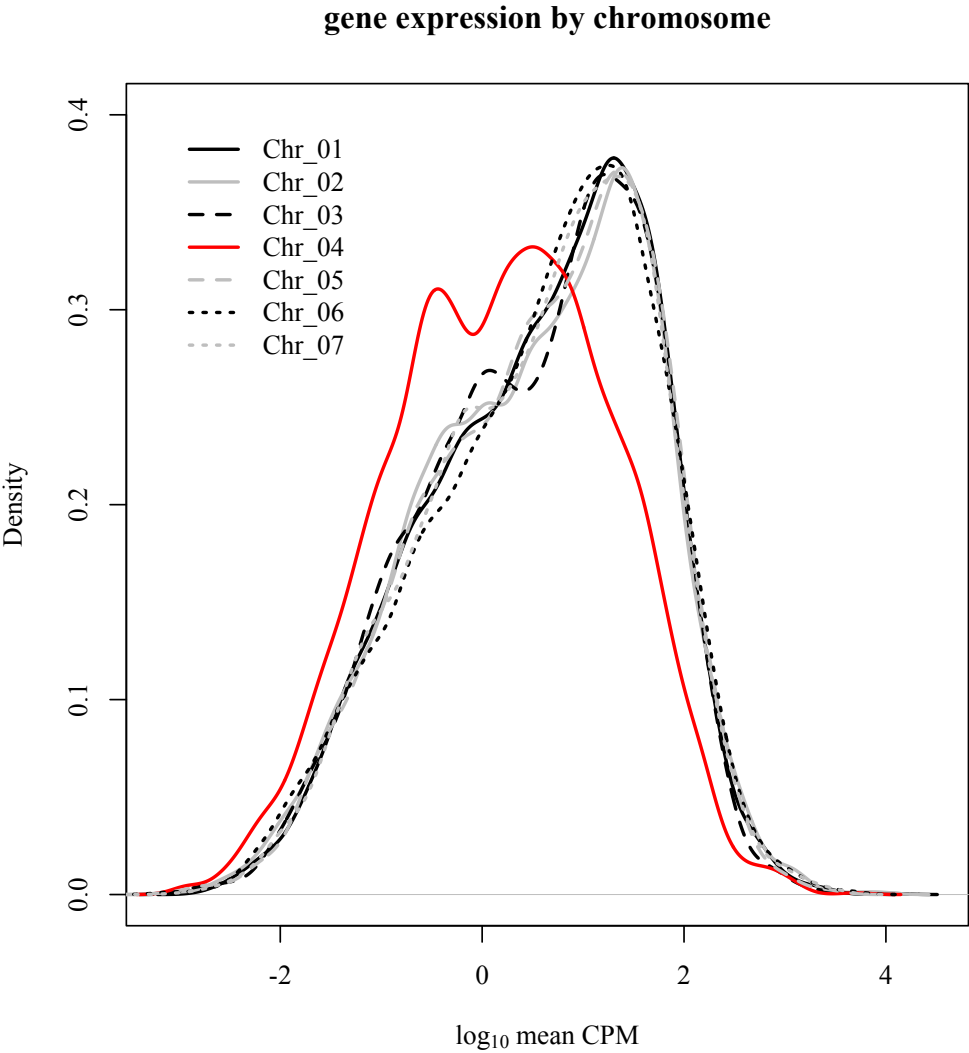

Supplement: supp [file elife_poa_e36426_Figure_7_figure_supplement_2.pdf › elife_poa_e36426_Figure_7_figure_supplement_2.pdf]
